# Supplementary material
Source: PubMed Central journal article supplement (PMC3617939)
Supplement: supp_M031088_jlr.M031088-1.pdf [file supp_M031088_jlr.M031088-1.pdf]

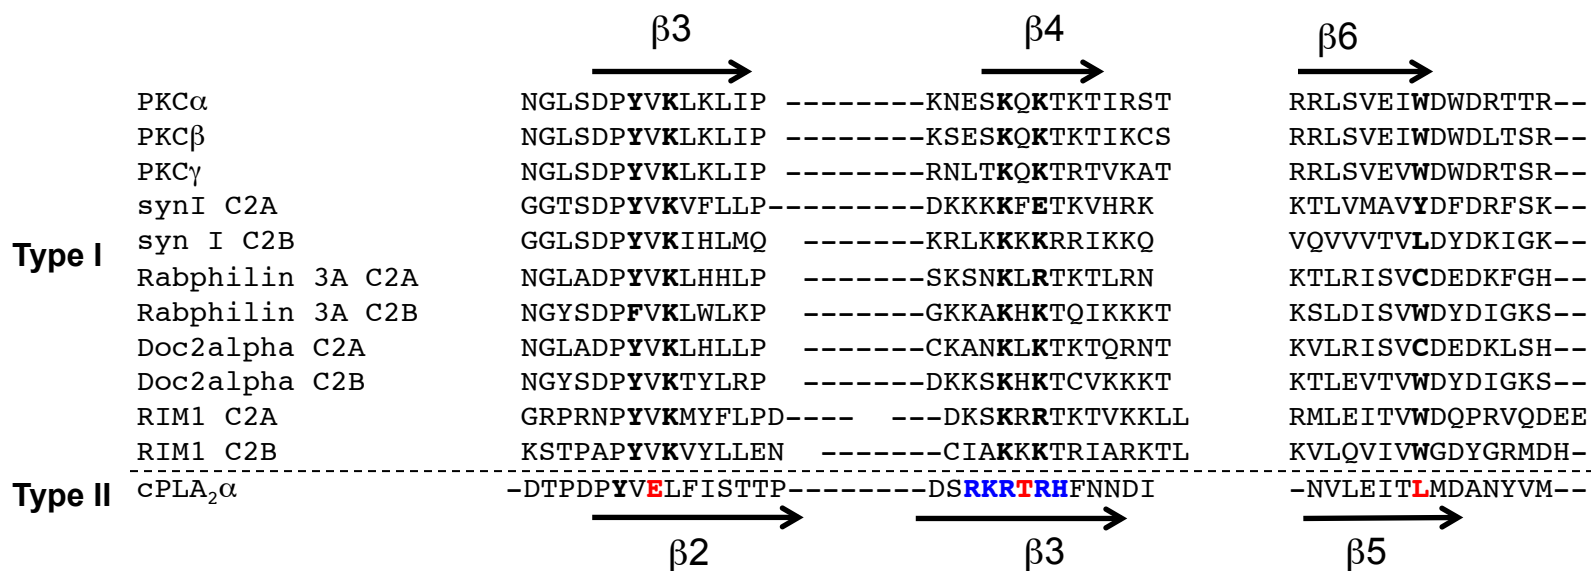

Fig. S1. Sequence alignment of the  $\beta$ -groove region from various C2 domains including type I and II topologies. The C2 domain of PKC $\alpha$  was used to perform the sequence alignment. Residues for Type I topology C2 domains that have been shown to bind phosphoinositides, particularly PI(4,5)P $_2$  are shown in bold. For cPLA $_2\alpha$  residues that are conserved with the purported PI(4,5)P $_2$  binding residues are shown in bold, residues that are distinct from PI(4,5)P $_2$  binding residues are highlighted in red, and C1P binding residues including those involved in nonspecific electrostatics are shown in blue.
