# Supplementary material
Source: PubMed Central journal article supplement (PMC3617939)
Supplement: supp_M031088_jlr.M031088-2.pdf [file supp_M031088_jlr.M031088-2.pdf]

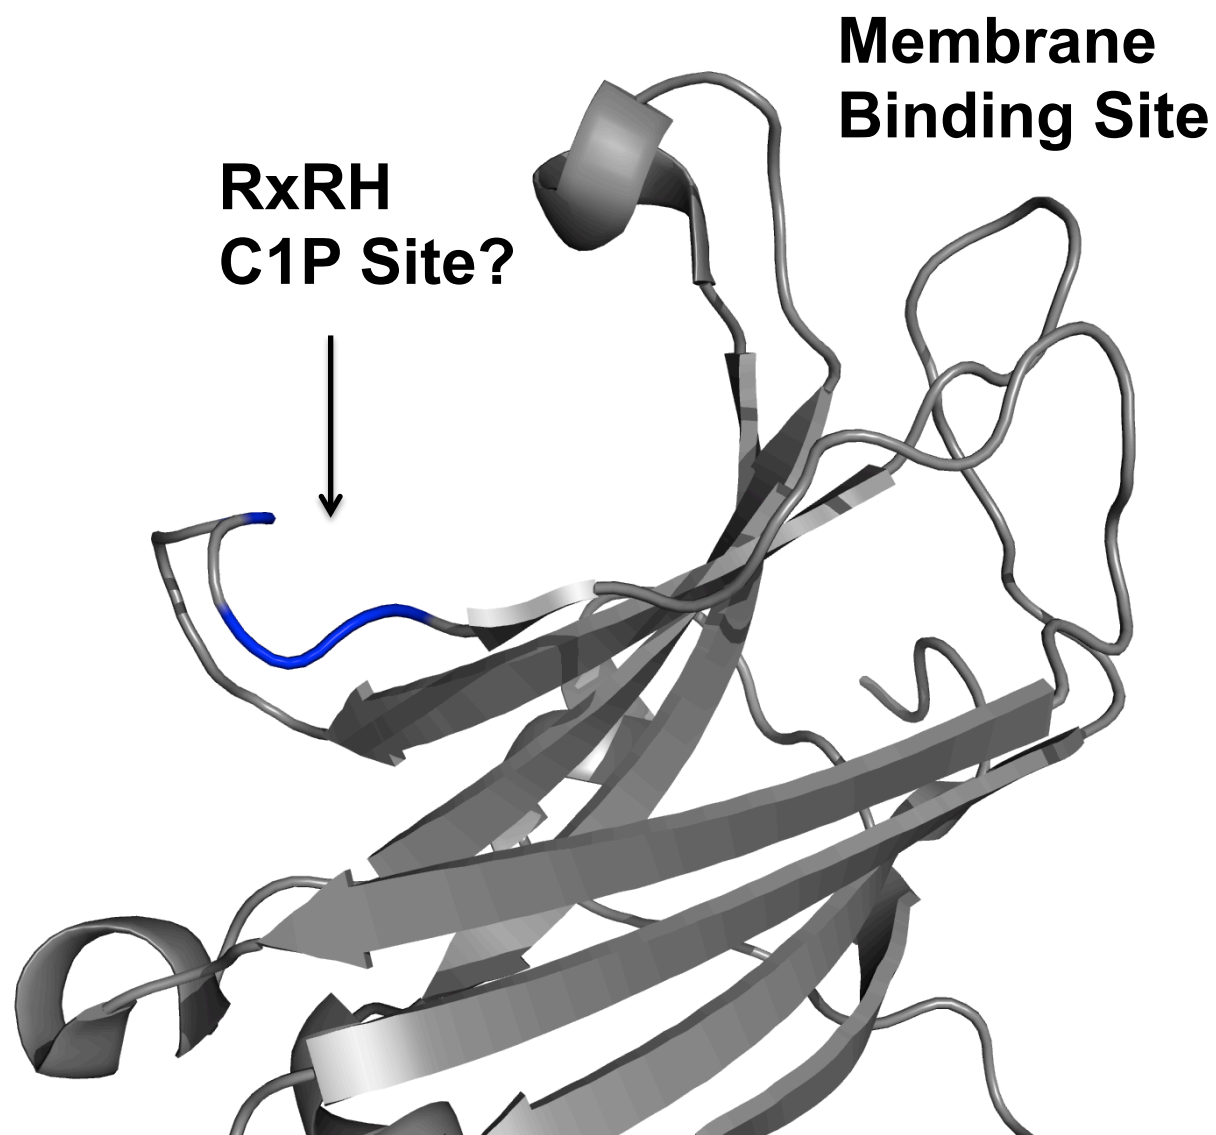

Fig. S2. **Structure of the RGP3 C2 domain.** The C2 domain of RGP3 (PDB ID: 3FBK) harbors a putative membrane binding site similar to other C2 domains as well as a RxRH motif in a similar position to that of the C2 domain of cPLA<sub>2</sub> $\alpha$ .
